# Supplementary material
Source: publisher figshare collection journal article supplement (https://springernature.figshare.com/ndownloader/files/31581050)
Supplement: Supplementary file 1 [file 31581050]

Measurement(s),brain white matter
Technology Type(s),magnetic resonance imaging
Sample Characteristic - Organism,Homo sapiens
